# Supplementary material
Source: PubMed Central journal article supplement (PMC6541532)
Supplement: NIHMS1030822-supplement-S1.pdf [file NIHMS1030822-supplement-S1.pdf]

**Table S1:** Adaptations from Patient Mobilization Attitudes & Beliefs Survey (PMABS) to PMABS for the ICU (PMABS-ICU)

| <b>Item No.</b> | <b>Word/Phrase on PMABS</b>   | <b>Word/Phrase on PMABS-ICU</b>                        |
|-----------------|-------------------------------|--------------------------------------------------------|
| 1               | inpatients                    | patients                                               |
| 2               | inpatients                    | patients                                               |
| 3               | inpatients                    | patients                                               |
| 4               | inpatients                    | patients                                               |
| 5               | inpatients                    | patients                                               |
| 6               | inpatients                    | patients                                               |
| 7               | inpatients                    | patients                                               |
| 8               | inpatients                    | patients                                               |
| 9               | inpatients, unit(s)           | patients, unit                                         |
| 10              | inpatients                    | patients                                               |
| 11              | inpatients                    | patients                                               |
| 12              | inpatients                    | patients                                               |
| 13              | inpatients                    | patients                                               |
| 14              | departmental leadership       | leadership in the MICU                                 |
| 15              | inpatients                    | patients                                               |
| 16              | inpatients                    | patients                                               |
| 17              | inpatients                    | patients                                               |
| 18              | inpatients, three times daily | patients, once daily (if there is no contraindication) |
| 19              | inpatients                    | patients                                               |
| 20              | inpatients                    | patients                                               |
| 21              | inpatients                    | patients                                               |
| 22              | inpatients                    | patients                                               |
| 23              | inpatients                    | patients                                               |
| 24              | inpatients                    | patients                                               |
| 25              | inpatients                    | patients                                               |
| 26              | three times daily             | once daily                                             |

Abbreviations: MICU = Medical ICU
