# Supplementary material
Source: PubMed Central journal article supplement (PMC6541532)
Supplement: NIHMS1030822-supplement-S2.pdf [file NIHMS1030822-supplement-S2.pdf]

**Table S2:** Items with any “not applicable” response, with frequency by clinical role\*

| Sub-scale | Item No. | Item Text                                  | Clinical Technician<br>n=7 | Nurse<br>n=86 | Respiratory Therapist<br>n=14 | Attending<br>n=13 | Fellow<br>n=28 | NP/<br>PA<br>n=7 | Total #<br>(%)<br>N=155 |
|-----------|----------|--------------------------------------------|----------------------------|---------------|-------------------------------|-------------------|----------------|------------------|-------------------------|
| Knowledge | 2        | ... training on how to safely mobilize.... | 0                          | 0             | 0                             | 2                 | 0              | 0                | 2 (1%)                  |
| Attitudes | 21       | ... not feel confident in my ability....   | 0                          | 0             | 0                             | 4                 | 2              | 0                | 6 (4%)                  |
| Behaviors | 15       | ... increases my risk for injury.          | 0                          | 0             | 0                             | 5                 | 0              | 0                | 5 (3%)                  |
|           | 23       | ... do not have time....                   | 0                          | 1             | 0                             | 6                 | 5              | 2                | 14 (9%)                 |
|           | 24       | ... mobilize my patients at least once.... | 0                          | 1             | 2                             | 6                 | 9              | 2                | 20 (13%)                |

Abbreviations: NP = Nurse Practitioner; PA = Physician Assistant

\*The effect of respondents who chose “not applicable” on analysis of sub-scale internal consistency was evaluated in two ways. First, we performed a sensitivity analysis removing the 22 (of 155) respondents who ever chose “not applicable” and found no important difference in Cronbach’s alpha or inter-scale correlations, as reported in Table 2. Second, because of the greater frequency of “not applicable” responses in non-nursing clinical roles (respiratory therapist, attending and fellow physicians, nurse practitioner, and physician assistant), we performed subgroup analyses of Cronbach’s alpha and inter-scale correlations for each of these groups and found no significant differences between nursing and non-nursing clinical roles.
