# Supplementary material
Source: PubMed Central journal article supplement (PMC6541532)
Supplement: NIHMS1030822-supplement-S3.pdf [file NIHMS1030822-supplement-S3.pdf]

**Table S3:** Themes identified in respondent comments for an open-ended question regarding “other issues regarding patient mobility”

| <b>Theme</b>                                              | <b>Frequency*</b><br>n = 155 |
|-----------------------------------------------------------|------------------------------|
| <b>Equipment and safety</b>                               | 9 (6%)                       |
| <b>Responsibility for mobility with PT/OT versus RN</b>   | 9 (6%)                       |
| <b>Time constraints</b>                                   | 6 (4%)                       |
| <b>Knowledge deficits</b>                                 | 3 (2%)                       |
| <b>Sedation</b>                                           | 3 (2%)                       |
| <b>Overweight and obese patients</b>                      | 3 (2%)                       |
| <b>Coordination of care</b>                               | 3 (2%)                       |
| <b>Lack of experience</b>                                 | 2 (1%)                       |
| <b>Day-shift versus night-shift issues; patient sleep</b> | 2 (1%)                       |
| <b>Severity of illness</b>                                | 2 (1%)                       |
| <b>Patients requiring restraints</b>                      | 1 (1%)                       |
| <b>Unit culture</b>                                       | 1 (1%)                       |

Abbreviations: OT = Occupational Therapy. PT = Physical Therapy. RN = Registered Nurse

\* Of all respondents (155), 29 made comments (19%), and some comments included more than 1 theme;

hence the sum is >29.
