# Supplementary material
Source: PubMed Central journal article supplement (PMC6541532)
Supplement: NIHMS1030822-supplement-S4.pdf [file NIHMS1030822-supplement-S4.pdf]

**Table S4:** Score for each barrier item by clinical role of survey participant\*

| Item No.         | Item Text                                                                                | Clinical Technician<br>n=7 | Nurse<br>n=86 | Respiratory Therapist<br>n=14 | Attending<br>n=13 | Fellow<br>n=28 | NP/PA<br>n=7 |
|------------------|------------------------------------------------------------------------------------------|----------------------------|---------------|-------------------------------|-------------------|----------------|--------------|
| <b>Knowledge</b> |                                                                                          |                            |               |                               |                   |                |              |
| 2                | ... training on how to safely mobilize....                                               | 4.1 (1.1)                  | 3.2 (1.0)     | 3.7 (1.3)                     | 2.5 (0.8)         | 2.7 (1.2)      | 3.1 (1.5)    |
| 5                | ... w hich patients are appropriate to refer to physical therapy.                        | 4.1 (0.4)                  | 3.9 (0.8)     | 3.6 (0.8)                     | 3.8 (0.6)         | 4.0 (0.5)      | 3.7 (1.1)    |
| 6                | ... w hich patients are appropriate to refer to occupational therapy.                    | 3.7 (0.5)                  | 3.9 (0.8)     | 3.6 (0.8)                     | 3.6 (0.5)         | 3.7 (0.9)      | 3.7 (1.1)    |
| 25               | ... educate my patients to exercise or increase their physical activity.                 | 3.7 (1.0)                  | 3.6 (0.8)     | 3.6 (0.9)                     | 3.4 (1.0)         | 3.9 (0.8)      | 3.4 (1.1)    |
| <b>Attitudes</b> |                                                                                          |                            |               |                               |                   |                |              |
| 1                | ... too sick to be mobilized.                                                            | 2.9 (1.1)                  | 2.9 (1.1)     | 3.1 (0.7)                     | 4.0 (0.6)         | 4.0 (0.7)      | 3.3 (1.3)    |
| 3                | ... mobilization of my patients w ill be harmful to them.                                | 3.4 (1.0)                  | 3.5 (0.9)     | 3.8 (0.7)                     | 4.5 (0.5)         | 4.3 (0.5)      | 3.9 (1.3)    |
| 4                | ... therapist should be the primary care provider to mobilize my patients.               | 1.7 (1.3)                  | 2.3 (1.1)     | 1.9 (0.7)                     | 2.5 (1.1)         | 2.5 (1.0)      | 2.1 (1.2)    |
| 12               | ... mobilization of my patients w ill be more w ork for nurses.                          | 2.6 (1.1)                  | 2.2 (1.0)     | 2.5 (0.9)                     | 2.1 (0.6)         | 2.1 (0.7)      | 1.9 (0.4)    |
| 13               | ... mobilization of my patients w ill be more w ork for physical and/or occupational.... | 3.0 (1.3)                  | 3.0 (1.0)     | 2.5 (1.1)                     | 2.6 (1.0)         | 2.4 (1.0)      | 1.9 (0.4)    |
| 18               | ... patients w ho are mobilized at least once daily w ill have better outcomes.          | 4.3 (0.8)                  | 4.3 (0.6)     | 4.2 (0.6)                     | 4.5 (0.5)         | 4.5 (0.7)      | 4.3 (1.1)    |
| 19               | ... not sure w hen it is safe to mobilize my patients.                                   | 3.7 (1.0)                  | 3.5 (0.9)     | 3.4 (0.9)                     | 3.8 (0.4)         | 3.7 (0.7)      | 3.9 (0.9)    |
| 21               | ... not feel confident in my ability to mobilize my patients.                            | 3.0 (1.2)                  | 3.0 (1.1)     | 3.6 (1.0)                     | 3.1 (1.1)         | 2.5 (1.0)      | 3.4 (1.1)    |
| 26               | ... patients have time during their day to be mobilized at least once daily.             | 3.6 (1.0)                  | 3.7 (0.6)     | 3.6 (0.5)                     | 4.4 (0.7)         | 4.4 (0.6)      | 4.1 (0.7)    |
| <b>Behaviors</b> |                                                                                          |                            |               |                               |                   |                |              |
| 7                | ... don't have the proper equipment and/or furnishings to mobilize my patients.          | 4.4 (0.5)                  | 3.4 (1.0)     | 3.9 (0.9)                     | 3.9 (0.5)         | 4.1 (0.9)      | 3.3 (1.3)    |
| 8                | ... physical functioning of my patients is regularly discussed ....                      | 4.0 (0.6)                  | 3.3 (1.0)     | 3.6 (0.9)                     | 4.1 (0.5)         | 3.6 (0.9)      | 2.7 (1.0)    |
| 9                | ... staffing is adequate to mobilize patients on my unit.                                | 3.4 (0.5)                  | 3.0 (1.1)     | 3.2 (0.7)                     | 3.5 (0.9)         | 3.6 (1.0)      | 4.0 (0.6)    |
| 10               | ... contraindications to be mobilized.                                                   | 2.4 (0.5)                  | 2.8 (1.0)     | 2.8 (0.8)                     | 3.4 (1.0)         | 3.7 (0.7)      | 2.9 (1.1)    |
| 11               | ... mobilized at least once daily by nurses.                                             | 2.7 (1.0)                  | 2.7 (1.0)     | 3.1 (0.9)                     | 3.3 (0.9)         | 3.4 (0.9)      | 2.9 (1.6)    |
| 14               | ... leadership in the MICU is very supportive of patient mobilization.                   | 4.0 (0.6)                  | 3.6 (0.8)     | 3.9 (0.5)                     | 4.5 (0.5)         | 4.5 (0.6)      | 4.0 (0.8)    |
| 15               | ... mobilizing my patients increases my risk for injury.                                 | 2.9 (1.2)                  | 2.5 (1.1)     | 3.6 (0.8)                     | 3.6 (1.1)         | 3.6 (1.0)      | 3.1 (1.2)    |
| 16               | ... usually have appropriate physician orders to do so.                                  | 4.0 (0.6)                  | 3.3 (0.9)     | 3.6 (0.8)                     | 3.7 (0.8)         | 3.2 (0.9)      | 3.7 (1.0)    |
| 17               | ... patients are resistant to being mobilized.                                           | 3.1 (0.7)                  | 2.8 (0.9)     | 3.1 (0.7)                     | 4.0 (0.7)         | 3.4 (0.9)      | 3.0 (1.2)    |
| 20               | ...Family members of my patients are frequently interested to help mobilize....          | 3.7 (0.5)                  | 3.1 (0.9)     | 3.9 (0.5)                     | 3.8 (0.6)         | 3.5 (0.7)      | 3.1 (0.9)    |
| 22               | ... document the physical functioning status of my patients....                          | 3.3 (1.3)                  | 4.1 (0.5)     | 2.4 (0.7)                     | 2.5 (0.9)         | 2.5 (0.6)      | 2.7 (0.8)    |
| 23               | ... do not have time to mobilize my patients ....                                        | 3.1 (0.4)                  | 2.8 (1.1)     | 3.2 (0.9)                     | 2.6 (1.5)         | 2.4 (1.1)      | 3.6 (0.5)    |
| 24               | ... mobilize my patients at least once during my shift/work day.                         | 2.7 (0.8)                  | 3.2 (0.9)     | 2.7 (0.9)                     | 3.4 (1.1)         | 2.9 (0.9)      | 2.6 (0.5)    |

Abbreviations: NP = Nurse Practitioner; PA = Physician Assistant

\*Mean (standard deviation) score for each survey item by clinical role, rated on a 1-5 scale where 1=strongly disagree and 5=strongly agree. For consistency, scoring of negatively-worded items (i.e., items 1, 3, 4, 7, 10, 12, 13, 15, 17, 19, 21, 23) was reversed before the statistic was calculated.
